# Supplementary material for: Epidermal Growth Factor Receptor (EGFR) mutation analysis, gene expression profiling and EGFR protein expression in primary prostate cancer
Source: BMC Cancer. 2011 Jan 25;11:31. doi: 10.1186/1471-2407-11-31 (PMC3040720; doi:10.1186/1471-2407-11-31)
Supplement: Additional file 2 — Table S2. 79-gene signature (40 up-regulated and 39 down-regulated) distinguishing EGFRhigh/mutated samples from EGFRhigh/WT samples [file 1471-2407-11-31-S2.XLS]

## Sheet: Sheet1
Up regulated probes
Agilent ID	Symbol	Name	p-value
A_23_P215491	CCL24	chemokine (C-C motif) ligand 24	0.006421474
A_23_P110353			0.0065662693
A_23_P86996			0.006688251
A_23_P74299	ADORA1	adenosine A1 receptor	0.0067373784
A_23_P75732	OR5M11	olfactory receptor, family 5, subfamily M, member 11	0.0067866975
A_23_P370574	KIR3DL3	killer cell immunoglobulin-like receptor, three domains, long cytoplasmic tail, 3	0.0069730757
A_23_P161857	OR5D16	olfactory receptor, family 5, subfamily D, member 16	0.0070109926
A_23_P137630	HP1BP3	heterochromatin protein 1, binding protein 3	0.0070109926
A_23_P107048	SUMO2	SMT3 suppressor of mif two 3 homolog 2 (S. cerevisiae)	0.007137266
A_23_P137786	ADAMTSL4	ADAMTS-like 4	0.007137266
A_23_P63484			0.007137266
A_23_P1153			0.0071626627
A_23_P163506	CYBA	cytochrome b-245, alpha polypeptide	0.0071626627
A_23_P12719	SYNPO2L	synaptopodin 2-like	0.0071626627
A_23_P12189	DFFA	DNA fragmentation factor, 45kDa, alpha polypeptide	0.0071881074
A_23_P35995	ASAM	adipocyte-specific adhesion molecule	0.0071881074
A_23_P74241	MTF1	metal-regulatory transcription factor 1	0.0071881074
A_23_P65357	SYNJ2BP	synaptojanin 2 binding protein	0.007239138
A_23_P149724	NUCKS1	nuclear casein kinase and cyclin-dependent kinase substrate 1	0.007239138
A_23_P217704	GYG2	glycogenin 2	0.008372977
A_23_P38525	SC65	synaptonemal complex protein SC65	0.008372977
A_23_P116057	SAC3D1	SAC3 domain containing 1	0.0085173175
A_23_P116587	OMP	olfactory marker protein	0.008546336
A_23_P32348	P2RX2	purinergic receptor P2X, ligand-gated ion channel, 2	0.009413623
A_23_P88913	SYNGR3	synaptogyrin 3	0.009477376
A_23_P501414	PCTK1	PCTAIRE protein kinase 1	0.009702182
A_23_P30392	NEUROG1	neurogenin 1	0.009831807
A_23_P34518	FABP3	fatty acid binding protein 3, muscle and heart (mammary-derived growth inhibitor)	0.009864345
A_23_P123448	MMP16	matrix metallopeptidase 16 (membrane-inserted)	0.009896936
A_23_P210465	PI3	peptidase inhibitor 3, skin-derived	0.009896936
A_23_P78950	PIP5K1C	phosphatidylinositol-4-phosphate 5-kinase, type I, gamma	0.0069608158
A_23_P360213	#N/A	CYTOCHROME c OXIDASE III	0.007213599
A_23_P76350	GNB3	guanine nucleotide binding protein (G protein), beta polypeptide 3	0.008144644
A_23_P115215	VPS72	vacuolar protein sorting 72 homolog (S. cerevisiae)	0.008201426
A_23_P116110			0.009541341
A_23_P131252			0.009541341
A_23_P103315	LCE1A	LATE CORNIFIED ENVELOPE PROTEIN 1A	0.009929579
A_23_P161837	MRVI1	murine retrovirus integration site 1 homolog	0.009929579
A_23_P250951	SLC26A2	solute carrier family 26 (sulfate transporter), member 2	0.009929579
A_23_P212196	OGG1	8-oxoguanine DNA glycosylase	0.0097345095
DOWN regulated probes
Agilent ID	Symbol	Name	p-value
A_23_P356088	SGMS1	sphingomyelin synthase 1	0.0097345095
A_23_P201655	MYCBP	c-myc binding protein	0.008315593
A_23_P366376	TDGF1	teratocarcinoma-derived growth factor 1	0.008229892
A_23_P28869	PTPRA	protein tyrosine phosphatase, receptor type, A	0.009962275
A_23_P31085	CCDC28A	coiled-coil domain containing 28A	0.009962275
A_23_P394276	RWDD4A	RWD domain containing 4A	0.007947501
A_23_P209946	RETSAT	retinol saturase (all-trans-retinol 13,14-reductase)	0.007213599
A_23_P79692	ABI2	abl-interactor 2	0.007213599
A_23_P428992	LOC93622	hypothetical LOC93622	0.007213599
A_23_P413075	TC2N	tandem C2 domains, nuclear	0.007213599
A_23_P148372	CSTF2	cleavage stimulation factor, 3' pre-RNA, subunit 2, 64kDa	0.0071119163
A_23_P49015	WDR61	WD repeat domain 61	0.0071119163
A_23_P100250			0.0071119163
A_23_P157435	AZIN1	antizyme inhibitor 1	0.0071119163
A_23_P26704	MFSD11	major facilitator superfamily domain containing 11	0.0069608158
A_23_P88439	TC2N	tandem C2 domains, nuclear	0.009995023
A_23_P25964	GALC	galactosylceramidase	0.009995023
A_23_P101721	ZNF45	zinc finger protein 45	0.009896936
A_23_P104201	YME1L1	YME1-like 1 (S. cerevisiae)	0.009831807
A_23_P104541			0.009702182
A_23_P27048	TMEM199	transmembrane protein 199	0.009318395
A_23_P213893	MEGF10	multiple EGF-like-domains 10	0.0085173175
A_23_P79931	ATRN	attractin	0.0085173175
A_23_P31747	C8orf76	chromosome 8 open reading frame 76	0.00848835
A_23_P164459	TXNDC2	thioredoxin domain containing 2 (spermatozoa)	0.008459431
A_23_P117540	STYX	serine/threonine/tyrosine interacting protein	0.008430563
A_23_P388762	GPR107	G protein-coupled receptor 107	0.008401745
A_23_P17144	GPN1	GPN-loop GTPase 1	0.008372977
A_23_P14515	ACOT4	acyl-CoA thioesterase 4	0.00834426
A_23_P380724	LOC100134015	hypothetical LOC100134015	0.0072647245
A_23_P204333	ALG10	asparagine-linked glycosylation 10, alpha-1,2-glucosyltransferase homolog (S. pombe)	0.007239138
A_23_P80778	DIRC2	disrupted in renal carcinoma 2	0.007239138
A_23_P93954	PSMA2	proteasome (prosome, macropain) subunit, alpha type, 2	0.0071881074
A_23_P57059	STAU1	staufen, RNA binding protein, homolog 1 (Drosophila)	0.0071626627
A_23_P81954	NEU1	sialidase 1 (lysosomal sialidase)	0.0071626627
A_23_P95189	SNUPN	snurportin 1	0.007137266
A_23_P6624	UMPS	uridine monophosphate synthetase	0.007137266
A_23_P62731	MRPS14	mitochondrial ribosomal protein S14	0.0070613595
A_23_P9145	UHRF2	ubiquitin-like with PHD and ring finger domains 2	0.0070109926
